# Supplementary material for: Lipoate-binding proteins and specific lipoate-protein ligases in microbial sulfur oxidation reveal an atpyical role for an old cofactor
Source: eLife journal article supplement (doi:10.7554/elife.37439), 2018-07-13
Supplement: supp [file elife_poa_e37439_Figure_2_figure_supplement_1.docx]

**Figure 2-figure supplement 1**


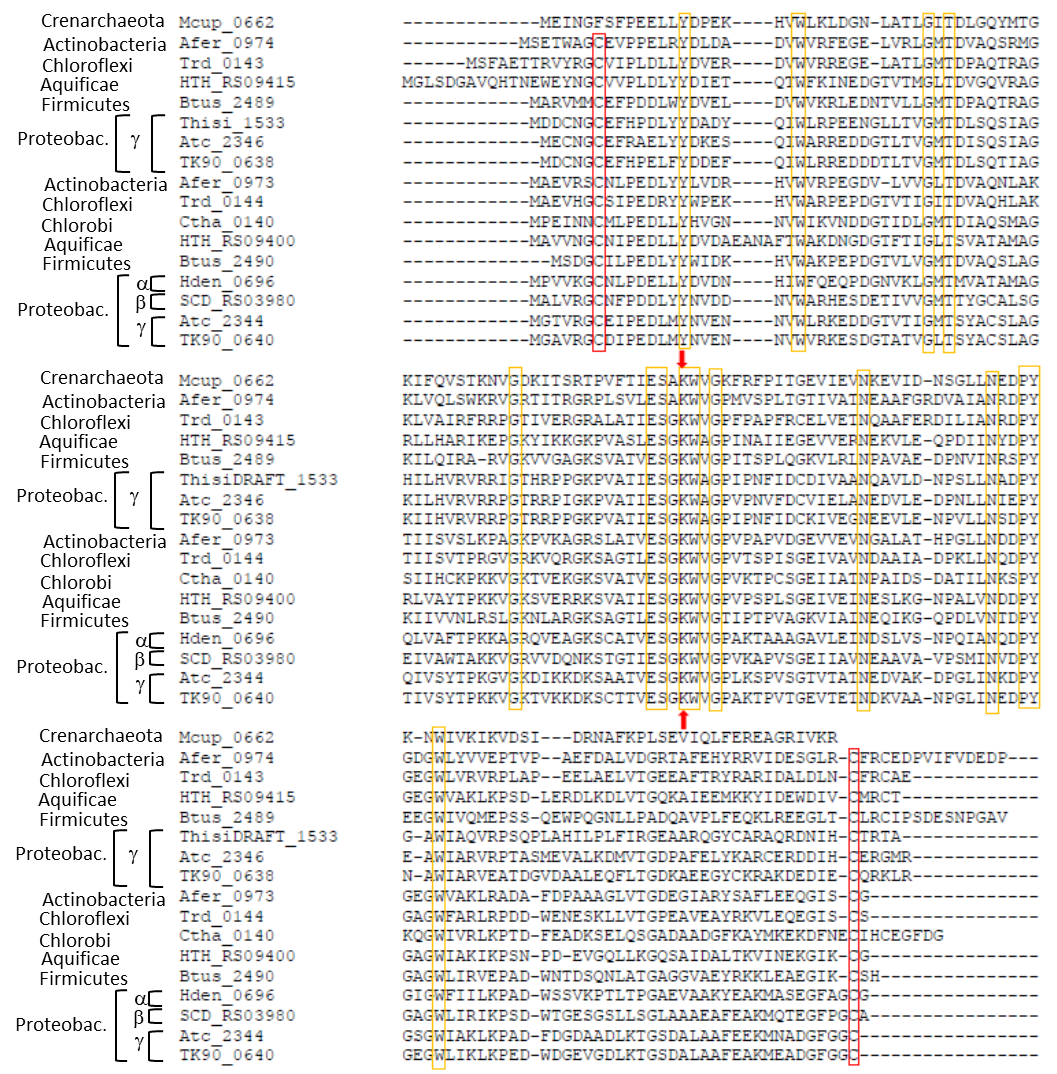


**Sequence alignment of Hdr-associated lipoate-binding proteins from seven archaeal and bacterial phyla.** The strictly conserved lipoate-binding lysine residue shared with the H proteins of the glycine-cleavage system is indicated by red arrows. Strictly conserved residues are marked with yellow boxes. Strictly conserved cysteine residues are highlighted by red boxes. Species: *Metallosphaera cuprina* Ar4T (Mcup_0662 (AEB947679)) *Acidimicrobium ferrooxidans* DSM 10331T (Afer_0973 (Acu53912), Afer_0974 (ACU53913)), *Thermomicrobium roseum* DSM 5159T (Trd_0143 (ACM05628), Trd_0144 (ACM04497)), *Hydrogenobacter thermophiles* (HTH_RS09400 (HTH_1874, BAI70318), HTH_RS09415 (HTH_1877, BAI70321), *Kyrpidia tusciae* DSM 2912T(Btus_2489 (ADG07149), Btus_2490 (ADG07150)), *Thiorohdospira sibirica* ATCC 700588T (ThisiDRAFT_1533 (EGZ46119)), *Acidithiobacillus caldus* SM-1 (Atc_2344 (AEK58992), Atc_2346 (AEK58994)), *Thioalkalivibrio* sp. K90mix (TK90_0638 (ADC71153), TK_0640 (ADC71155)), *Chloroherpeton thalassium* ATCC 35110T (Ctha_0140 (ACF12611)), *Hyphomicrobium denitrificans* ATCC 51888T (Hden_0696 (ADJ22516)), *Sulfuricella denitrificans* DSM 22764T (SCD_RS03985 (SCD_01710, BAN34642)). Proteobac., Proteobacteria.
