# Supplementary material for: Lipoate-binding proteins and specific lipoate-protein ligases in microbial sulfur oxidation reveal an atpyical role for an old cofactor
Source: eLife journal article supplement (doi:10.7554/elife.37439), 2018-07-13
Supplement: supp [file elife_poa_e37439_Figure_3_figure_supplement_1.docx]

**Figure 3-figure supplement 1.**

**
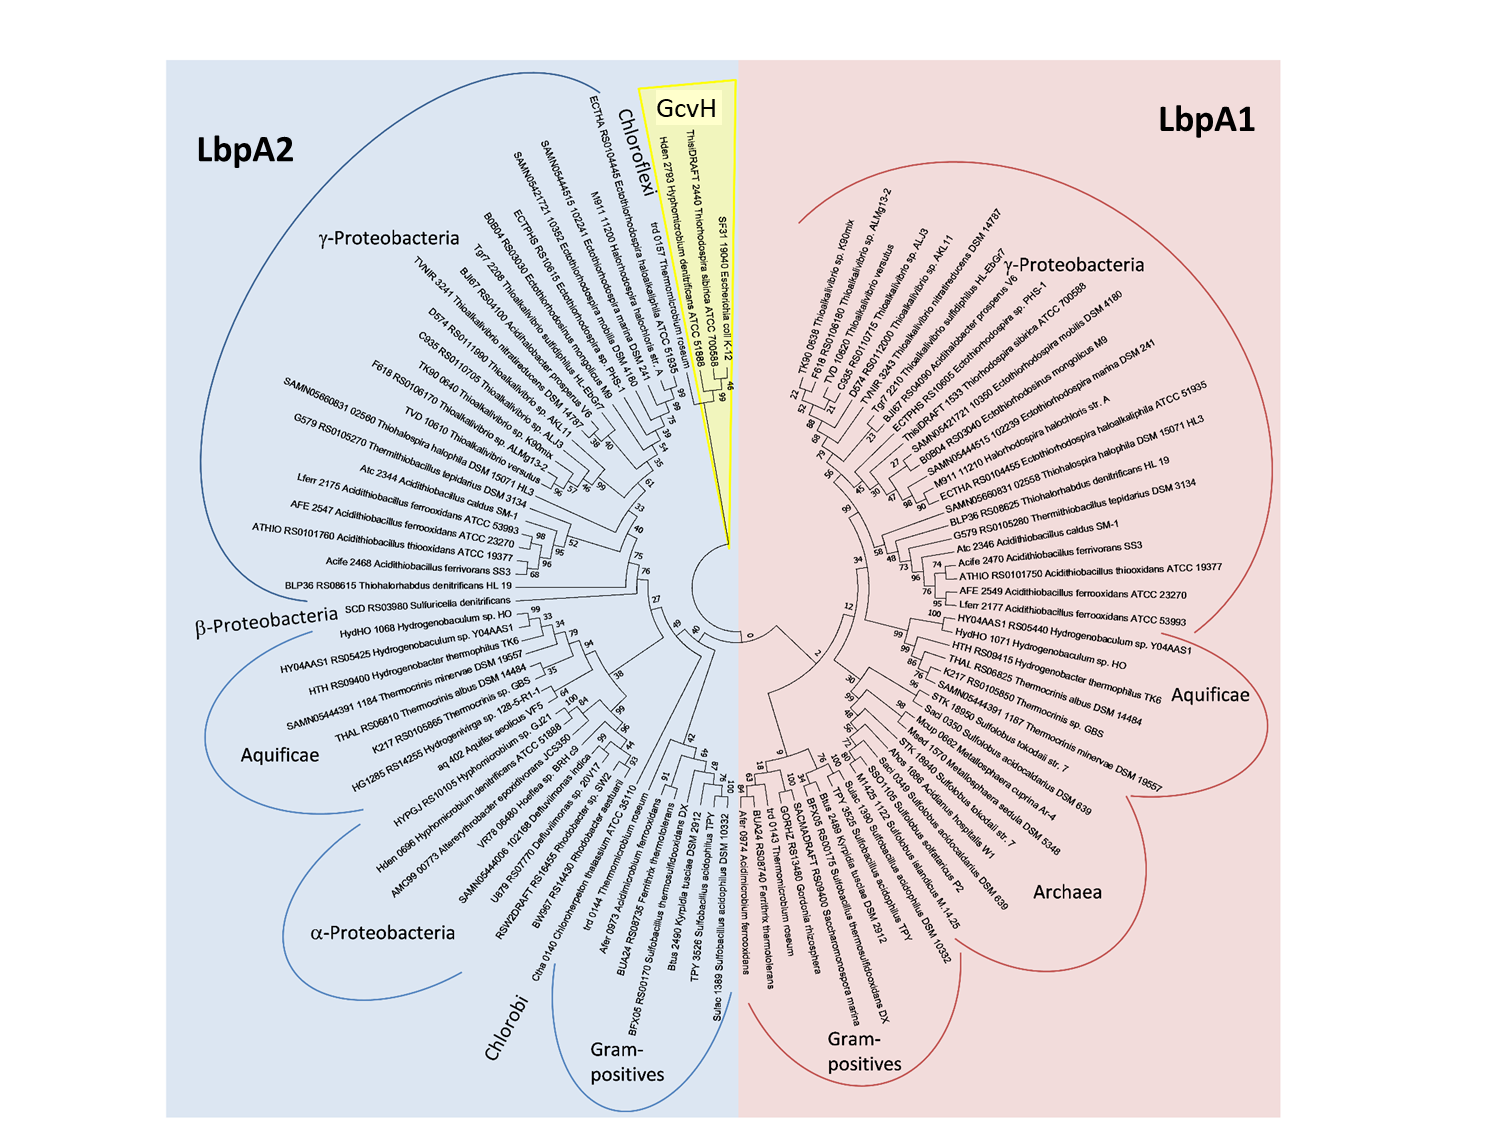
**

**Molecular phylogenetic analysis of LbpA and GvcH proteins by maximum likelihood method.** Three bona fide GvcH proteins were included in the analysis (GcvH from *Escherichia coli* K12 substr. W3110 (BAE76969), ThisiDRAFT_2440 from *Thiorhodospira sibirica*, and Hden_2793 from *Hyphomicrobium denitrificans*).First, the best amino acid substitution model was calculated in MEGA7(*Kumar et al., 2016*). The Le_Gascuel_2008 model (*Le and Gascuel, 2008*) had the lowest BIC (Bayesian information Criterion) score and was considered to describe the substitution pattern the best. The evolutionary history was then inferred by using the Maximum Likelihood method based on this model. The tree with the highest log likelihood (-5373.74) is shown. Bootstrap values given at branching points are based on 1000 replicates. Initial tree(s) for the heuristic search were obtained automatically by applying Neighbor-Join and BioNJ algorithms to a matrix of pairwise distances estimated using a JTT model, and then selecting the topology with superior log likelihood value. A discrete Gamma distribution was used to model evolutionary rate differences among sites (5 categories (+*G*, parameter = 0.8540)). The tree is drawn to scale, with branch lengths measured in the number of substitutions per site. The analysis involved 98 amino acid sequences. All positions containing gaps and missing data were eliminated. There were a total of 123 positions in the final dataset. Evolutionary analyses were conducted in MEGA7 (*Kumar et al., 2016*).

**References**

Kumar S, Stecher G, Tamura K. 2016. MEGA7: Molecular evolutionary genetics analysis version 7.0 for bigger datasets. *Molecular Biology and Evolution* **33**:1870-1874. doi: 10.1093/molbev/msw054, PMID: 27004904

Le SQ, Gascuel O. 2008. An improved general amino acid replacement matrix. *Molecular Biology and Evolution* **25**:1307-20. doi: 10.1093/molbev/msn067, PMID: 18367465
