# Supplementary material for: Lipoate-binding proteins and specific lipoate-protein ligases in microbial sulfur oxidation reveal an atpyical role for an old cofactor
Source: eLife journal article supplement (doi:10.7554/elife.37439), 2018-07-13
Supplement: supp [file elife_poa_e37439_Figure_4_figure_supplement_1.docx]

**Figure 4-figure supplement 1**

**A**


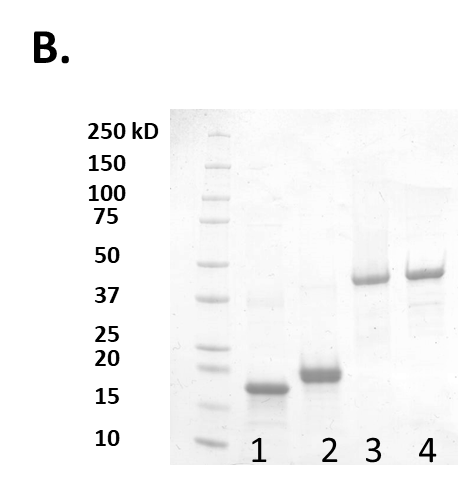


**B**

**
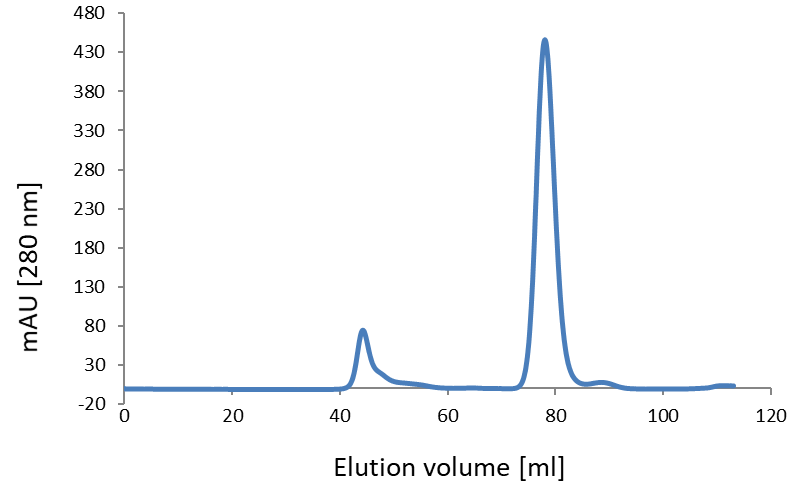
**

**A,** **Purification of LbpA and LplA-like proteins**. Lane 1, LbpA1 from *T. sibirica*; lane 2, LbpA2 from *H. denitrificans*; lane 3, LplA from *Thioalkalivibrio* sp. K90 mix; lane 4, LplA from *H. denitrificans*. **B**, **Analysis of *T. sibirica* LbpA1 by gel permeation chromatography on Superdex 75**. Buffer: 20 mM sodium phosphate, pH 7.4 containing 150 mM NaCl. Protein elution peaked at 79 ml corresponding to a mass of 16-18 kDa. The protein thus behaved as a monomer.
