# Supplementary material for: Lipoate-binding proteins and specific lipoate-protein ligases in microbial sulfur oxidation reveal an atpyical role for an old cofactor
Source: eLife journal article supplement (doi:10.7554/elife.37439), 2018-07-13
Supplement: supp [file elife_poa_e37439_Figure_7_figure_supplement_1.docx]

**Figure 7-figure supplement 1**


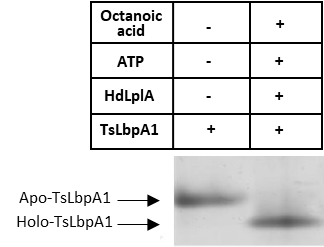


Mobility shift assay for analysis of *in vitro* octanoylation catalyzed by HdLplA from *Hyphomicrobium denitrificans* (Hden_0686) using LbpA1 from *Thiorhodospira sibirica* (TsLbpA1, ThisiDRAFT_1533) as acceptor. Loss of the positive charge of the modified lysine amino group of TsLbpA1 results in faster migration of the modified form on Urea-PAGE gels.
